# Supplementary material for: Probing the oral-brain connection: Oral microbiome patterns in a large community cohort with anxiety, depression, and trauma symptoms, and periodontal outcomes
Source: Research Square preprint supplement (doi:10.21203/rs.3.rs-4328261/v1), 2024-05-31
Supplement: Supplementary file 1 [file 1450bf63e468e69a181db285.xlsx]

## Sheet: Sheet1
	Table 3: Comparative statistics of continuous and categorical variables for the state anxiety symptom vs. healthy control cohorts
				Total cohort (n = 470)					Healthy controls (n = 164)					State anxiety symptoms cohort (n = 256)
				median	IQR				median	IQR				median	IQR				p-value
				n	%				n	%				n	%
		Age		40	31	–	50		38.5	30	–	47.5		41	32	–	50		NS
		BMI		22.79	20.6925	–	25.35		22.81	20.94	–	25.4125		22.85	20.695	–	25.235		NS
		CTQ_total		34	29	–	44		29	27	–	34		39	31	–	51		< 0.001
		WHOQOL_DOM1		14.29	12	–	16.57		16.57	14.86	–	17.855		12.57	10.86	–	14.29		< 0.001
		WHOQOL_DOM2		13	10	–	15.33		16	14	–	17.33		10.67	8.67	–	12.67		< 0.001
		WHOQOL_DOM3		12.665	9.33	–	14.67		14.67	13.33	–	17.33		10.67	8	–	13.33		< 0.001
		WHOQOL_DOM4		15	12.5	–	16.5		16.5	15	–	18		13.5	11.5	–	15.5		< 0.001
		WHOQOL_OV_QOL_GH		7	5	–	8		8	7	–	9		6	4	–	7		< 0.001
		PCL_Total		17.5	5	–	35		5	1	–	11.5		28	14	–	42		< 0.001
		CESD_Total		16	8	–	30		6	2	–	10		26	17	–	35		< 0.001
		STAI_S_Total		44	35	–	54		32	27.75	–	36		53	47	–	59		< 0.001
		STAI_T_Total		49	40	–	58		37	33	–	41		56	51	–	61		< 0.001
		LPS		0.16872	0.130347	–	0.225912		0.165095	0.135807	–	0.207579		0.170537	0.130347	–	0.230289		NS
		KYN (log)		0.321404	0.151288	–	0.486663		0.365098	0.178152	–	0.48064		0.365098	0.178152	–	0.48064		NS
		5HT (log)		-0.727855	-2.15645	–	-0.203684		-0.506587	-1.13261	–	0.0298268		-0.506587	-1.13261	–	0.0298268		< 0.005
		TRP (log)		3.7612	3.62544	–	3.8717		3.7612	3.61333	–	3.87328		3.76227	3.60358	–	3.87751		NS
		KYN/TRP (log)		3.45363	3.27477	–	3.68496		3.45491	3.26517	–	3.78328		3.48308	3.26517	–	3.78328		NS
		5HT/TRP (log)		2.47293	0.971229	–	2.95108		2.6227	2.10965	–	3.19073		2.6227	2.10965	–	3.19073		< 0.05
		Female		341	0.725532				110	0.670732				192	0.75				NS
		Gingivitis diagnosis		30	0.105634				6	0.0909091				21	0.112903				NS
		Periodontitis diagnosis		34	0.0723404				11	0.0670732				18	0.0703125				NS
		IBS/Coeliac/Crohn's diagnosis		78	0.165957				18	0.109756				55	0.214844				< 0.05
		Psychotherapeutic Response
		Unresponsive		29	0.0900621				3	0.0357143				25	0.123762				< 0.001
		Responsive		195	0.60559				65	0.77381				105	0.519802
		Somewhat responsive		98	0.304348				16	0.190476				72	0.356436
		Psychoactive medication *		117	0.441509				12	0.206897				87	0.497143				< 0.001
		Smoking status (yes)		120	0.255319				32	0.195122				76	0.296875				< 0.05
		PTSD symptoms		73	0.155319				0	0				68	0.265625				< 0.001
		State anxiety symptoms		256	0.544681				0	0				256	1				< 0.001
		Trait anxiety symptoms		281	0.597872				0	0				232	0.90625				< 0.001
		Predicted periodontitis
		TeethPPD6 *		81	0.413265				21	0.488372				55	0.413534				NS
		SeverePerioCDCAAP *		106	0.540816				27	0.627907				70	0.526316				NS
		TeethCAL5 *		93	0.47449				24	0.55814				63	0.473684				NS
		* Psychoactive medication: Total cohort (n = 256), HC (n = 58), State anxiety symptoms cohort (n = 175); TeethPPD6, SeverePerioCDCAAP, TeethCAL5: Total cohort (n = 196), HC (n = 43), State anxiety symptoms cohort (n = 133); Gingivitis diagnosis: Total cohort (n = 284), HC (n = 66), State anxiety symptoms cohort (n = 186)
