# Supplementary material for: Probing the oral-brain connection: Oral microbiome patterns in a large community cohort with anxiety, depression, and trauma symptoms, and periodontal outcomes
Source: Research Square preprint supplement (doi:10.21203/rs.3.rs-4328261/v1), 2024-05-31
Supplement: Supplementary file 2 [file 2a43d4c66d38f915721f46e7.xlsx]

## Sheet: Sheet1
	Table 4: Comparative statistics of continuous and categorical variables for the PTSD symptom vs. healthy control cohorts
				Total cohort (n = 470)						Healthy controls (n = 164)						PTSD symptoms cohort (n = 73)
				median	IQR					median	IQR					median	IQR				p-value
																mean	± sd
				n	%					n	%					n	%
		Age		40	31	–	50			38.5	30	–	47.5			40.6027	± 12.5				NS
		BMI		22.79	20.6925	–	25.35			22.81	20.94	–	25.4125			21.74	19.71	–	24.68		< 0.05
		CTQ_total		34	29	–	44			29	27	–	34			45	34	–	59		< 0.001
		WHOQOL_DOM1		14.29	12	–	16.57			16.57	14.86	–	17.855			11.8589	± 2.9				< 0.001
		WHOQOL_DOM2		13	10	–	15.33			16	14	–	17.33			10.2286	± 2.6				< 0.001
		WHOQOL_DOM3		12.665	9.33	–	14.67			14.67	13.33	–	17.33			10.67	8	–	13.33		< 0.001
		WHOQOL_DOM4		15	12.5	–	16.5			16.5	15	–	18			13	11	–	15.5		< 0.001
		WHOQOL_OV_QOL_GH		7	5	–	8			8	7	–	9			6	4	–	6		< 0.001
		PCL_Total		17.5	5	–	35			5	1	–	11.5			46	38	–	54		< 0.001
		CESD_Total		16	8	–	30			6	2	–	10			32	± 10.4				< 0.001
		STAI_S_Total		44	35	–	54			32	27.75	–	36			56.0411	± 9.8				< 0.001
		STAI_T_Total		49	40	–	58			37	33	–	41			59	± 7.0				< 0.001
		LPS_Concentration		0.16872	0.130347	–	0.225912			0.165095	0.135807	–	0.207579			0.170537	0.126183	–	0.230471		NS
		KYN (log)		0.321404	0.151288	–	0.486663			0.365098	0.178152	–	0.48064			0.295719	0.137954	–	0.432886		NS
		5HT (log)		-0.727855	-2.15645	–	-0.203684			-0.506587	-1.13261	–	0.0298268			-1.98975	-2.91951	–	-0.461569		< 0.001
		TRP (log)		3.7612	3.62544	–	3.8717			3.7612	3.61333	–	3.87328			3.74513	3.63221	–	3.83186		NS
		KYN/TRP (log)		3.45363	3.27477	–	3.68496			3.45491	3.26517	–	3.78328			3.45572	3.30959	–	3.64414		NS
		5HT/TRP (log)		2.47293	0.971229	–	2.95108			2.6227	2.10965	–	3.19073			1.27628	0.225368	–	2.81552		< 0.01
		Female		341	0.725532					110	0.670732					63	0.863014				< 0.01
		Gingivitis diagnosis		30	0.105634					6	0.0909091					9	0.157895				NS
		Periodontitis diagnosis		34	0.0723404					11	0.0670732					6	0.0821918				NS
		IBS/Coeliac/Crohn's diagnosis		78	0.165957					18	0.109756					15	0.205479				NS
		Psychotherapeutic Response
		Unresponsive		29	0.0900621					3	0.0357143					5	0.0769231				< 0.05
		Responsive		195	0.60559					65	0.77381					35	0.538462
		Somewhat responsive		98	0.304348					16	0.190476					25	0.384615
		Psychoactive medication *		117	0.441509					12	0.206897					34	0.618182				< 0.001
		Smoking status (yes)		120	0.255319					32	0.195122					22	0.30137				NS
		PTSD symptoms		73	0.155319					0	0					73	1				< 0.001
		State anxiety symptoms		256	0.544681					0	0					68	0.931507				< 0.001
		Trait anxiety symptoms		281	0.597872					0	0					72	0.986301				< 0.001
		Predicted periodontitis
		TeethPPD6 *		81	0.413265					21	0.488372					14	0.358974				NS
		SeverePerioCDCAAP *		106	0.540816					27	0.627907					21	0.538462				NS
		TeethCAL5 *		93	0.47449					24	0.55814					19	0.487179				NS
		* Psychoactive medication: Total cohort (n = 256), HC (n = 58), PTSD symptoms cohort (n = 55); TeethPPD6, SeverePerioCDCAAP, TeethCAL5: Total cohort (n = 196), HC (n = 43),PTSD symptoms cohort (n = 39); Gingivitis diagnosis: Total cohort (n = 284), HC (n = 66), PTSD cohort (n = 57)
