# Supplementary material for: Probing the oral-brain connection: Oral microbiome patterns in a large community cohort with anxiety, depression, and trauma symptoms, and periodontal outcomes
Source: Research Square preprint supplement (doi:10.21203/rs.3.rs-4328261/v1), 2024-05-31
Supplement: Supplementary file 4 [file 8008b3a7f7a9792f728e75b2.xlsx]

## Sheet: Sheet1
	Table 1: Comparative statistics of continuous and categorical variables for the depressive symptoms and healthy control cohorts
				Total cohort (n = 470)					Healthy controls (n = 164)					Depressive symptom cohort (n = 148)
				median	IQR				median	IQR				median	IQR				p-value
				n	%				n	%				n		%
		Age		40	31	–	50		38.5	30	–	47.5		40	33	–	51		NS
		BMI		22.79	20.6925	–	25.35		22.81	20.94	–	25.4125		22.885	20.37	–	26.015		NS
		CTQ_total		34	29	–	44		29	27	–	34		43.5	34	–	55.25		< 0.001
		WHOQOL_DOM1		14.29	12	–	16.57		16.57	14.86	–	17.855		12	9.71	–	13.14		< 0.001
		WHOQOL_DOM2		13	10	–	15.33		16	14	–	17.33		9.33	8	–	11.33		< 0.001
		WHOQOL_DOM3		12.665	9.33	–	14.67		14.67	13.33	–	17.33		9.33	6.67	–	12		< 0.001
		WHOQOL_DOM4		15	12.5	–	16.5		16.5	15	–	18		13	11	–	14.625		< 0.001
		WHOQOL_OV_QOL_GH		7	5	–	8		8	7	–	9		5	4	–	6		< 0.001
		PCL_Total		17.5	5	–	35		5	1	–	11.5		35	21	–	47		< 0.001
		CESD_Total		16	8	–	30		6	2	–	10		35	31	–	41		< 0.001
		STAI_S_Total		44	35	–	54		32	27.75	–	36		57	50	–	62		< 0.001
		STAI_T_Total		49	40	–	58		37	33	–	41		59	55	–	64		< 0.001
		LPS_Concentration		0.16872	0.130347	–	0.225912		0.165095	0.135807	–	0.207579		0.180009	0.131636	–	0.255094		NS
		KYN (log)		0.321404	0.151288	–	0.486663		0.365098	0.178152	–	0.48064		0.330081	0.14707	–	0.461588		NS
		5HT (log)		-0.727855	-2.15645	–	-0.203684		-0.506587	-1.13261	–	0.0298268		-1.28719	-2.7925	–	-0.404185		< 0.001
		TRP (log)		3.7612	3.62544	–	3.8717		3.7612	3.61333	–	3.87328		3.76707	3.64277	–	3.87005		NS
		KYN/TRP (log)		3.45363	3.27477	–	3.68496		3.45491	3.26517	–	3.78328		3.4438	3.27998	–	3.63279		NS
		5HT/TRP (log)		2.47293	0.971229	–	2.95108		2.6227	2.10965	–	3.19073		1.86593	0.33711	–	2.71104		< 0.001
		Female		341	0.725532				110	0.670732				113		0.763514			NS
		Gingivitis diagnosis		30	0.105634				6	0.0909091				12		0.102564			NS
		Periodontitis diagnosis		34	0.0723404				11	0.0670732				10		0.0675676			NS
		IBS/Coeliac/Crohn's diagnosis		78	0.165957				18	0.109756				29		0.195946			< 0.05
		Psychotherapeutic Response
		Unresponsive		29	0.0900621				3	0.0357143				19		0.148438			< 0.001
		Responsive		195	0.60559				65	0.77381				65		0.507812
		Somewhat responsive		98	0.304348				16	0.190476				44		0.34375
		Psychoactive medication *		117	0.441509				12	0.206897				68		0.612613			< 0.001
		Smoking status (yes)		120	0.255319				32	0.195122				45		0.304054			< 0.05
		PTSD symptoms		73	0.155319				0	0				54		0.364865			< 0.001
		State anxiety symptoms		256	0.544681				0	0				136		0.918919			< 0.001
		Trait anxiety symptoms		281	0.597872				0	0				144		0.972973			< 0.001
		Predicted periodontitis
		TeethPPD6 *		81	0.413265				21	0.488372				29		0.358025			NS
		SeverePerioCDCAAP *		106	0.540816				27	0.627907				37		0.45679			NS
		TeethCAL5 *		93	0.47449				24	0.55814				35		0.432099			NS
		* Psychoactive medication: Total cohort (n = 256), HC (n = 58), Depressive symptom cohort (n = 111); TeethPPD6, SeverePerioCDCAAP, TeethCAL5: Total cohort (n = 196), HC (n = 43), Depressive symptom cohort (n = 81); Gingivitis diagnosis: Total cohort (n = 284), HC (n = 66), Depressive symptom cohort (n = 117)
